# Supplementary material
Source: bioRxiv or medRxiv preprint supplement (https://medrxiv.org/highwire/filestream/88200/field_highwire_adjunct_files/0/2020.07.01.20144253-1.pdf)
Supplement: Supplementary file [file 2020.07.01.20144253-1.pdf]

Supplementary Figure 2. Geometric mean ratio of half-lives, averaged across all four surfaces.

| Effect  | Surfaces Compared        |                          | Estimate | p-value       |
|---------|--------------------------|--------------------------|----------|---------------|
| Surface | \$1 U.S.A.<br>Bank Note  | \$20 U.S.A. Bank<br>Note | 1.17     | 0.5254        |
| Surface | \$1 U.S.A.<br>Bank Note  | Clothing                 | 1.44     | 0.1621        |
| Surface | \$1 U.S.A.<br>Bank Note  | Skin                     | 0.55     | <b>0.0400</b> |
| Surface | \$20 U.S.A.<br>Bank Note | Clothing                 | 1.22     | 0.3242        |
| Surface | \$20 U.S.A.<br>Bank Note | Skin                     | 0.47     | <b>0.0075</b> |
| Surface | Clothing                 | Skin                     | 0.38     | <b>0.0015</b> |
